# Supplementary material for: Spatiotemporal variables comparison between drop jump and horizontal drop jump in elite jumpers and sprinters
Source: PeerJ. 2024 Feb 26;12:e17026. doi: 10.7717/peerj.17026 (PMC10903347; doi:10.7717/peerj.17026)
Supplement: Supplemental Information 1 [file peerj-12-17026-s001.xlsx]

## Sheet: SLJ
SLJ (M)	FT_SLJ
3.05	0.277
3.1	0.529
2.98	0.524
3.15	0.517
3.02	0.512
3.1	0.532
3.11	0.535
3.12	0.544
3.04	0.509
3.1	0.543
3	0.525
3.05	0.514
3.1	0.529
3.12	0.512
3	0.525
3.12	0.544

## Sheet: 30 cm 
Vertical						Horizontal
GCT	FT	EFT	CFT	JH_30	T-GRF2	GCT	FT	EFT	CFT	Distance	T-GRF2 vetical	T-GRF2 horizontal
0.2	0.735	0.125	0.075	0.662451	0.158	0.333	0.523	0.177	0.156	3.1	0.177	0.236
0.207	0.705	0.088	0.119	0.609477	0.095	0.245	0.572	0.111	0.134	3.23	0.111	0.185
0.206	0.734	0.108	0.098	0.66065	0.165	0.289	0.591	0.141	0.148	3.01	0.159	0.22
0.214	0.75	0.096	0.118	0.689766	0.155	0.326	0.61	0.151	0.175	3.1	0.202	0.202
0.195	0.651	0.065	0.13	0.519686	0.066	0.313	0.5	0.135	0.178	3.09	0.176	0.179
0.239	0.656	0.099	0.14	0.5277	0.105	0.317	0.493	0.143	0.174	3.05	0.178	0.233
0.211	0.74	0.102	0.109	0.671494	0.125	0.34	0.54	0.18	0.16	3.13	0.207	0.248
0.209	0.724	0.081	0.128	0.642771	0.101	0.239	0.593	0.105	0.134	3.24	0.105	0.174
0.218	0.693	0.122	0.096	0.588905	0.122	0.307	0.612	0.143	0.164	3.08	0.156	0.238
0.208	0.741	0.089	0.119	0.673311	0.155	0.32	0.601	0.146	0.174	3.12	0.2	0.203
0.172	0.674	0.06	0.112	0.557056	0.06	0.294	0.498	0.138	0.156	2.98	0.161	0.184
0.253	0.667	0.109	0.144	0.545545	0.109	0.323	0.502	0.153	0.17	3.05	0.153	0.207
0.2	0.708	0.081	0.119	0.614675	0.094	0.245	0.572	0.111	0.134	3.23	0.111	0.185
0.19	0.665	0.069	0.121	0.542278	0.067	0.313	0.5	0.135	0.178	2.95	0.176	0.179
0.165	0.686	0.061	0.104	0.577068	0.069	0.294	0.498	0.138	0.156	3.14	0.161	0.184
0.209	0.724	0.081	0.128	0.642771	0.101	0.239	0.593	0.105	0.134	3.24	0.105	0.174

## Sheet: 40 cm 
Vertical						Horizontal
GCT	FT	EFT	CFT	JH_30	T-GRF2	GCT	FT	EFT	CFT	Distance	T-GRF2 vetical	T-GRF2 horizontal
0.25	0.764	0.112	0.138	0.715757	0.139	0.355	0.542	0.196	0.159	3.23	0.21	0.224
0.185	0.717	0.07	0.115	0.630402	0.097	0.239	0.617	0.108	0.131	3.26	0.108	0.109
0.275	0.667	0.126	0.149	0.545545	0.126	0.288	0.531	0.136	0.152	3	0.146	0.189
0.235	0.668	0.075	0.16	0.547182	0.151	0.283	0.529	0.107	0.176	3.12	0.177	0.189
0.187	0.622	0.074	0.113	0.474417	0.074	0.275	0.502	0.129	0.146	3.02	0.129	0.172
0.217	0.699	0.09	0.127	0.599147	0.105	0.222	0.526	0.107	0.115	3.05	0.107	0.155
0.255	0.776	0.106	0.149	0.738418	0.115	0.332	0.54	0.198	0.134	3.31	0.198	0.274
0.179	0.73	0.075	0.104	0.653469	0.074	0.211	0.608	0.096	0.115	3.3	0.096	0.096
0.202	0.692	0.093	0.109	0.587207	0.103	0.265	0.586	0.125	0.14	3.1	0.137	0.19
0.231	0.692	0.082	0.149	0.587207	0.146	0.272	0.513	0.104	0.168	3.1	0.171	0.182
0.193	0.703	0.072	0.121	0.606024	0.072	0.241	0.526	0.11	0.131	3.04	0.11	0.177
0.234	0.69	0.088	0.146	0.583818	0.096	0.239	0.512	0.109	0.13	3.08	0.109	0.159
0.181	0.719	0.07	0.115	0.630402	0.097	0.229	0.634	0.108	0.131	3.26	0.108	0.109
0.183	0.624	0.074	0.113	0.474417	0.074	0.296	0.55	0.129	0.146	3.02	0.129	0.172
0.211	0.7	0.09	0.127	0.599147	0.105	0.227	0.52	0.107	0.115	3.05	0.107	0.155
0.19	0.732	0.072	0.121	0.606024	0.072	0.239	0.526	0.11	0.131	3.04	0.11	0.177

## Sheet: 50 cm 
Vertical						Horizontal
GCT	FT	EFT	CFT	JH_30	T-GRF2	GCT	FT	EFT	CFT	Distance	T-GRF2 vetical	T-GRF2 horizontal
0.241	0.787	0.136	0.105	0.759501	0.184	0.338	0.564	0.162	0.176	3.22	0.202	0.234
0.189	0.717	0.081	0.108	0.630402	0.081	0.25	0.614	0.102	0.148	3.25	0.102	0.109
0.235	0.663	0.127	0.108	0.539021	0.127	0.328	0.559	0.167	0.161	3.05	0.167	0.243
0.267	0.734	0.076	0.191	0.66065	0.119	0.301	0.592	0.119	0.182	3.2	0.178	0.19
0.203	0.724	0.084	0.119	0.642771	0.084	0.343	0.526	0.172	0.171	3.09	0.172	0.281
0.25	0.699	0.098	0.152	0.599147	0.098	0.247	0.512	0.107	0.14	3.09	0.107	0.158
0.229	0.794	0.128	0.101	0.773072	0.166	0.359	0.514	0.211	0.148	3.17	0.227	0.243
0.181	0.73	0.082	0.099	0.653469	0.082	0.206	0.6	0.094	0.112	3.28	0.094	0.094
0.231	0.722	0.127	0.104	0.639225	0.17	0.281	0.582	0.142	0.139	3.1	0.141	0.211
0.24	0.7	0.076	0.164	0.600862	0.112	0.28	0.601	0.112	0.168	3.17	0.17	0.191
0.219	0.734	0.085	0.134	0.66065	0.122	0.384	0.542	0.192	0.192	3.15	0.285	0.307
0.234	0.689	0.1	0.134	0.582127	0.128	0.317	0.531	0.151	0.166	3.11	0.151	0.212
0.185	0.719	0.081	0.108	0.630402	0.081	0.25	0.614	0.102	0.148	3.25	0.102	0.109
0.2	0.72	0.087	0.119	0.642771	0.084	0.343	0.526	0.172	0.171	3.09	0.172	0.281
0.179	0.736	0.081	0.099	0.653469	0.082	0.206	0.6	0.094	0.112	3.28	0.094	0.094
0.212	0.729	0.086	0.134	0.66065	0.122	0.384	0.542	0.192	0.192	3.15	0.285	0.307
